# Supplementary material
Source: PubMed Central journal article supplement (PMC5958447)
Supplement: Saw_Appendix.pdf [file Saw_Appendix.pdf]

## Appendix

Table 1. Injury incidence and most prevalent injuries across football codes at the professional level

|                                | <b>Australian Football</b>        | <b>Rugby Union (English)</b>                                 | <b>Soccer (UEFA)</b>               | <b>American Football</b>       |
|--------------------------------|-----------------------------------|--------------------------------------------------------------|------------------------------------|--------------------------------|
| <b>Injury incidence</b>        | 41.7 injuries per club per season | 54 match injuries, 27 training injuries per club per season* | 2 injuries per player per season** |                                |
| <b>Most prevalent injuries</b> | Hamstring strain                  | ACL                                                          | Hamstring strain                   | Knee 'internal derangement'    |
|                                | ACL                               | Concussion                                                   | MCL                                | Ankle sprains                  |
|                                | Shoulder sprain / dislocation     | Hamstring strain                                             | Quadriceps strain                  | Concussion                     |
|                                | Leg / foot stress fractures       | Ankle syndesmosis                                            | Adductor pain / strain             | Upper leg contusion            |
|                                | Ankle sprains                     | MCL                                                          |                                    | Upper leg muscle-tendon injury |
|                                | Groin strains and osteitis pubis  |                                                              |                                    | AC joint injury                |
|                                | Knee cartilage injuries           |                                                              |                                    | Shoulder ligament sprain       |

Top injuries:

AFL- 2015 season. Missed games <sup>1</sup>

English Rugby Union- 2014-15 season, match injuries only. Days absent <sup>21</sup>

\* includes injuries that do not result in missed matches, limiting comparison

Soccer- UEFA 2001-2008, time-loss injuries. List of most common injuries causing >28 days absent <sup>20</sup>

\*\* included players unavailable for either training or match. Half of these injuries were classified as 'minor' and resulted in absences of less than 1 week

American Football- most common match injuries resulting in time-loss, ranked in order of frequency, not time lost <sup>14</sup>

Table 2. Incidence, prevalence and average missed matches from common injuries in the AFL<sup>1</sup>

|                                  | <b>Incidence</b> | <b>Prevalence</b> | <b>Average Missed Matches</b> |
|----------------------------------|------------------|-------------------|-------------------------------|
| Hamstring strain                 | 5.2              | 19.1              | 3.7                           |
| ACL rupture                      | 0.7              | 16.7              | 23.9                          |
| Shoulder sprain / dislocation    | 1.6              | 11.5              | 7.2                           |
| Leg / foot stress fractures      | 0.7              | 8.5               | 12.1                          |
| Ankle sprains                    | 2.4              | 7.2               | 3.0                           |
| Groin strains and osteitis pubis | 2.2              | 7.1               | 3.2                           |

|                         |     |     |     |
|-------------------------|-----|-----|-----|
| Knee cartilage injuries | 1.1 | 6.5 | 5.9 |
| Calf strains            | 2.9 | 5.9 | 2.0 |
| Concussion              | 1.5 | 4.2 | 2.8 |
| PCL sprains             | 0.5 | 3.2 | 6.4 |
| Quadriceps strains      | 1.0 | 2.2 | 2.2 |

*AFL- 2015 season*

*Incidence: number of new injuries / club / season*

*Prevalence: total number of missed matches / club / season*

*Average missed matches across the AFL: prevalence / incidence*
